# Supplementary material
Source: publisher figshare collection journal article supplement (https://frontiersin.figshare.com/ndownloader/files/20311155)
Supplement: Supplementary file [file 20311155]

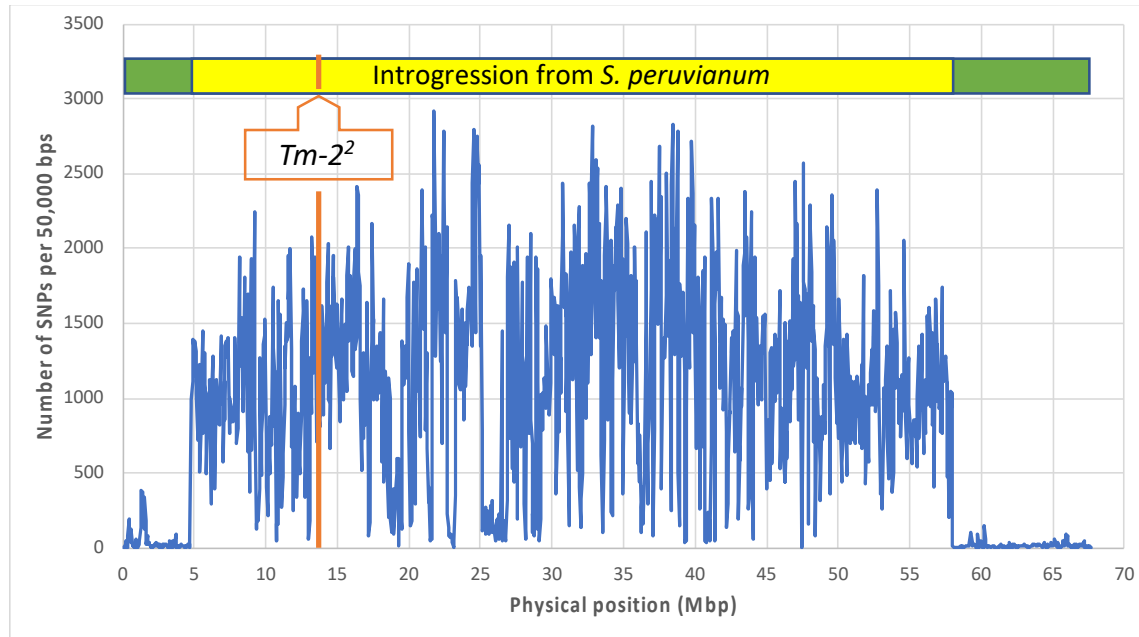

**Fig. S2. The frequency of SNPs, when aligning 150 bp reads of the modern cv. ‘Merlice’ to Chr. 9 of the reference tomato genome (cv. ‘Heinz’).** The figure illustrates the large introgression (yellow) harboring the gene *Tm-2<sup>2</sup>* (orange) from *S. peruvianum* P.I.18650. This gene provides resistance to tomato mosaic virus (ToMV). The distal parts of Chr. 9 that show high sequence similarity to the reference genome are represented by green blocks. Possible rearrangements of the introgression compared to the reference genome are not shown.
